# Supplementary material for: Brain abnormalities in myelomeningocele patients
Source: Springer Nature journal article supplement (doi:10.1007/s00381-019-04386-8), 2019-10-29
Supplement: MOESM1 [file 17326670]

**Appendix**

**Neuradiology Diagnostic Criteria**

- *Supratentorial*
  - Colpocephaly: disproportionate enlargement of the occipital horns of the lateral ventricles.
  - Partial/Total agenesis of the corpus callosum: absence of a part or all of the corpus callosum.
  - Dysplasia of the corpus callosum: thin corpus callosum.
  - Fusion of the thalami/Massa intermedia: considered large when greater than 10 mm
  - Stenogyria: defined as a packing of small gyri with no change of the general pattern of the hemispheres
  - Pachygyria: mild to moderate lissencephaly, cerebral cortex with only a few broad, flat convolutions
  - Gyral interdigitations/falx hypoplasia: gyri crossing the midline under an hypoplastic falx cerebri
  - Heterotopic gray matter: nodules or bands of grey matter mislocated, mostly periventricular
  - White matter maturation: T1-weighted images the intensity of white matter relative to grey matter increased with maturation / T2-weighted images maturation was interpreted as reduction in intensity of white relative to grey matter.
  - Craniolacunia: nonossified areas in the calvaria, imcomplete formation of the bones of the vault
- *Infratentorial*
  - Chiari malformation type II: inferior displacement of the cerebellar tonsils 5 mm or greater below the foramen magnum.
  - Cerebellar hypoplasia: when one or both cerebellar hemispheres were small with short but normally arranged fissures.
  - Brain stem hypoplasia: when the brainstem had reduced sagittal dimensions and the anterior curvature of the pons was flattened.
  - Small posterior fossa: posterior fossa with reduced sagittal dimensions and a corresponding steeply inclined tentorium.
